# Supplementary material for: Differential Organic Carbon Mineralization Responses to Soil Moisture in Three Different Soil Orders Under Mixed Forested System
Source: Frontiers journal article supplement (doi:10.3389/fenvs.2021.682450), 2021-06-22
Supplement: Data_Sheet_1.docx [file Data_Sheet_1.docx]

*Supplementary material*

Table S1. Mantel test statistics for extracellular enzyme activity and microbial community composition in the Ultisol, Alfisol, and Vertisol soils.

| Soil types | R2 | *P* value |
| --- | --- | --- |
| Ultisol | 0.067 | 0.13 |
| Alfisol | 0.008 | 0.39 |
| Vertisol | 0.013 | 0.35 |

Table S2. The PERMANOVA results for microbial community structure in the Ultisol, Alfisol, and Vertisol soils.

| Soil types | R2 | *P* value |
| --- | --- | --- |
| Ultisol | 0.042 | 0.35 |
| Alfisol | 0.024 | 0.41 |
| Vertisol | 0.110 | 0.12 |
